# Supplementary material
Source: PubMed Central journal article supplement (PMC4153769)
Supplement: gmic-5-326-s01.pdf [file gmic-5-326-s01.pdf]

**Supplemental Material to:**

**Kurt Selle, Yong Jun Goh, Sarah O'Flaherty, and  
Todd R Klaenhammer**

**Development of an integration mutagenesis system in  
Lactobacillus gasseri**

**Gut Microbes 2014; 5(3)**

**<http://dx.doi.org/10.4161/gmic.29101>**

**[http://www.landesbioscience.com/journals/gutmicrobes/  
article/29101/](http://www.landesbioscience.com/journals/gutmicrobes/article/29101/)**

## 1 Supplemental Material

### 2 Table S1. Primers used in this study.

| Primer Name | Sequence                                          | Use                                      | Source     |
|-------------|---------------------------------------------------|------------------------------------------|------------|
| M13f        | TGAAAACGACGGCCAGT                                 | General cloning                          |            |
| M13r        | TCACACAGGAAACAGCTATGAC                            | General cloning                          |            |
| pORI28f     | TTGGTTGATAATGAACTGTGCTG                           | General cloning                          | 15         |
| pORI28r     | TTGTTGTTTTTATGATTACAAAGTGA                        | General cloning                          | 15         |
| repAf       | TTGGGCGTATCTATGGCTGT                              | Integration screen                       | 15         |
| repAr       | CTGATAATTGCCCTCAAACCA                             | Integration screen                       | 15         |
| Erm323      | CAAACGCTCATTGGCATT                                | Integration screen                       | 15         |
| Erm615      | TTCCTGAGCCGATTTCAAAG                              | Integration screen                       | 15         |
| 1245-SOE-1  | CAGCAGGGATCCGATTTATCAGTAGAA<br>ACGCCTACTG         | Create <i>upp</i><br>deletion construct  | This study |
| 1245-SOE-2  | AACGGTAAACTTACCCATAATGG                           | Create <i>upp</i><br>deletion construct  | This study |
| 1245-SOE-3  | CCATTATGGGTAAGTTTACCGTTGATGC<br>AGGAGATAGATTGTTCG | Create <i>upp</i><br>deletion construct  | This study |
| 1245-SOE-4  | CAGCAGGAGCTCGTAAAAATCCAACCTG<br>GTTTTGCAT         | Create <i>upp</i><br>deletion construct  | This study |
| 1245-up     | TGTTAATGAAGTACCAGAGCGA                            | Integration screen                       | This study |
| 1245-dwn    | GTTGTCTTGCGATACCTTCAAT                            | Integration screen                       | This study |
| 1245-seqf   | ACGCCTACTGTTCTTCGT                                | Sequencing                               | This study |
| 1245seqr    | GTGATTTGACAAGGATATGGTCAT                          | Sequencing                               | This study |
| 1586-SOE-1  | CTGCTGGGATCCGGACGCCTAAAAGCA<br>TCATAT             | Create <i>ltaS</i><br>deletion construct | This study |
| 1586-SOE-2  | TCGCATTACTTTGAGCTGTTT                             | Create <i>ltaS</i><br>deletion construct | This study |
| 1586-SOE-3  | AAACAGCTCAAAGTAATGCGACTCTAA<br>TCATGCTTTATGGTGATC | Create <i>ltaS</i><br>deletion construct | This study |

---

|            |                                     |                                          |            |
|------------|-------------------------------------|------------------------------------------|------------|
| 1586-SOE-4 | CAGCAGGAGCTCCAATTCTGGAGCATCC<br>GTT | Create <i>ltaS</i><br>deletion construct | This study |
| 1586-up    | CTGTGAAGCCGCAATTATTT                | Integration screen                       | This study |
| 1586-dwn   | CATTGTGGAAGATTCCTAC                 | Integration screen                       | This study |

---

3  
4  
5  
6  
7  
8  
9  
10  
11  
12  
13
